# Supplementary material for: Odorant-binding proteins in canine anal sac glands indicate an evolutionarily conserved role in mammalian chemical communication
Source: PubMed Central journal article supplement (PMC8474896; doi:10.1186/s12862-021-01910-w), 2021-09-26
Supplement: 12862_2021_1910_MOESM7_ESM.pdf [file 12862_2021_1910_MOESM7_ESM.pdf]

Additional file 7: *obp* genes and secretion sites of their corresponding proteins.

| Gene name                 | Secreted protein                               | Reference                                                                              |
|---------------------------|------------------------------------------------|----------------------------------------------------------------------------------------|
| dog <i>obp3</i>           | skin dander                                    | Mattsson et al. 2010                                                                   |
| cattle <i>obp3</i>        | nasal mucosa                                   | Bignetti et al. 1985                                                                   |
| cattle <i>obp9</i>        | skin dander                                    | Rautiainen et al. 1998                                                                 |
| pig <i>obp4</i>           | nasal mucosa                                   | Paolini et al. 1998                                                                    |
| elephant <i>obp2</i>      | nasal mucosa                                   | Lazar et al. 2002                                                                      |
| mouse <i>obp1</i>         | vaginal secretion                              | Stopková et al. 2014; Černá et al. 2017                                                |
| mouse <i>obp2</i>         | vaginal secretion                              | Stopková et al. 2014; Černá et al. 2017                                                |
| mouse <i>obp5</i>         | vaginal secretion, saliva, tears, nasal mucosa | Pes et al. 1998; Stopková et al. 2014, 2017; Stopka et al, 2016; Černá et al. 2017     |
| mouse <i>obp6</i>         | vaginal secretion, saliva, tears, nasal mucosa | Stopková et al. 2014, 2017; Stopka et al, 2016; Černá et al. 2017; Kuntová et al. 2018 |
| mouse <i>obp7</i>         | vaginal secretion, saliva, tears, nasal mucosa | Pes et al. 1998; Stopková et al. 2014, 2017; Stopka et al, 2016; Černá et al. 2017     |
| mouse <i>obp8</i>         | vaginal secretion, tears                       | Stopková et al. 2014, 2017; Černá et al. 2017                                          |
| hamster <i>msp</i>        | saliva, tears                                  | Thavathiru et al. 1999                                                                 |
| hamster <i>flp</i>        | tears                                          | Ranganathan et al. 1999; Srikantan et al. 2005                                         |
| hamster <i>aphrodisin</i> | vaginal secretion                              | Briand et al. 2004a                                                                    |
