# Supplementary material for: Odorant-binding proteins in canine anal sac glands indicate an evolutionarily conserved role in mammalian chemical communication
Source: BMC Ecol Evol. 2021 Sep 26;21:182. doi: 10.1186/s12862-021-01910-w (PMC8474896; doi:10.1186/s12862-021-01910-w)
Supplement: Supplementary file 1 — Additional file 1. Information on individual dogs and total protein concentrations of ASGS samples. [file 12862_2021_1910_MOESM1_ESM.pdf]

Additional file 1: Information on individual dogs, and total protein concentrations of anal sac gland secretion samples

| Information of individual dogs |                 |           |        |                                        |             |             |        | Anal gland samples |
|--------------------------------|-----------------|-----------|--------|----------------------------------------|-------------|-------------|--------|--------------------|
| nr                             | age at sampling | age group | gender | breed                                  | inbreed     | origin      | born   | protein (mg/ml)    |
| 1                              | 6m              | YOUNG     | male   | great dane                             | PUREBRED    | Belgium     | home   | 733,94             |
| 2                              | 7m              | YOUNG     | male   | labrador                               | PUREBRED    | Belgium     | home   | 419,386            |
| 3                              | 1y              | YOUNG     | male   | mix (medium dog)                       | MIXED BREED | Romania     | street | 209,431            |
| 4                              | 4y              | ADULT     | male   | mix (shepherd-like)                    | MIXED BREED | Spain       | street | 219,847            |
| 5                              | 11y             | OLD       | male   | labrador x golden retriever x malinois | CROSSBREED  | Belgium     | home   | 37,807             |
| 6                              | 14y             | OLD       | male   | mix (shepherd-like)                    | MIXED BREED | Greece      | street | /                  |
| 7                              | 5m              | YOUNG     | female | Mix (husky/podenco-like)               | MIXED BREED | Spain       | street | 280,107            |
| 8                              | 5m              | YOUNG     | female | great dane                             | PUREBRED    | England     | home   | 264,119            |
| 9                              | 6m              | YOUNG     | female | great dane                             | PUREBRED    | Belgium     | home   | 420,271            |
| 10                             | 2y              | YOUNG     | female | great dane                             | PUREBRED    | Belgium     | home   | 451,372            |
| 11                             | 3y              | YOUNG     | female | mix (small dog)                        | MIXED BREED | Romania     | street | 868,677            |
| 12                             | 4y              | ADULT     | female | mix (podenco-like)                     | MIXED BREED | Spain       | street | 198,139            |
| 13                             | 4y              | ADULT     | female | great dane                             | PUREBRED    | Belgium     | home   | 13                 |
| 14                             | 7y              | ADULT     | female | great dane                             | PUREBRED    | Belgium     | home   | 739,517            |
| 15                             | 10y             | OLD       | female | labrador x german shepherd             | CROSSBREED  | Belgium     | home   | 580,196            |
| 16                             | 12y             | OLD       | female | labrador x border collie x boxer       | CROSSBREED  | Belgium     | home   | 404,382            |
| 17                             | 14y             | OLD       | female | border collie x labrador               | CROSSBREED  | Switzerland | home   | 6,042              |
| 7 (oestrus)                    | 2y              |           |        |                                        |             |             |        | 594,94             |
| 9 (oestrus)                    | 11m             |           |        |                                        |             |             |        | 550,811            |
| 10 (oestrus)                   | 2y              |           |        |                                        |             |             |        | 141,77             |
| 13 (oestrus)                   | 4y              |           |        |                                        |             |             |        | 5,441              |
